# Supplementary material for: In Vitro vs In Silico Detected SNPs for the Development of a Genotyping Array: What Can We Learn from a Non-Model Species?
Source: PLoS One. 2010 Jun 9;5(6):e11034. doi: 10.1371/journal.pone.0011034 (PMC2882948; doi:10.1371/journal.pone.0011034)
Supplement: Table S3 — List of the 184 in vitro SNPs and their frequencies in the total sequencing dataset, in the Aquitaine sequencing dataset and in the genotyped samples. (0.06 MB XLS) [file pone.0011034.s004.xls]

## Sheet: Table_S2
Table S3: List of the 184 in vitro SNPs and their frequencies in the total sequencing dataset, in the Aquitaine sequencing dataset and in the genotyped samples.
			Total dataset used for in vitro SNP detection (including Aquitaine sequences)			Aquitaine dataset used for in vitro SNP detection
SNP Name	Gene	Functionality Score	Number of sequences	MAFa		Number of sequences	MAFa		MAFa in the 456 genotyped samples	MAFa in the 212 unrelated G0 genotyped samples	NCBI ss accession number
AGP1-26	AGP1	0.645	26	0.46		13	0.38		0.382	0.404	184956779
BOTERO-202	BOTERO	0.97	33	0.242424		33	0.242424		0.226	0.194	184956781
BOTERO-77	BOTERO	0.906	28	0.25		28	0.25		0.225	0.195	184956780
C4H2-158	C4H2	0.511	35	0.08		9	0		Failedb	Failedb	-
C4H2-1782	C4H2	0.793	10	0.42		0	nad		0.049	0.055	184956782
C4H2-1860	C4H2	0.737	10	0.42		0	nad		0.057	0.059	184956783
C4H2-315	C4H2	0.633	50	0.29		23	0.17		Failedb	Failedb	-
C4H2-399	C4H2	0.904	50	0.24		23	0.13		Failedb	Failedb	-
C4H2-507	C4H2	0.553	50	0.2		23	0.04		Failedb	Failedb	-
C4H2-570	C4H2	0.665	50	0.17		23	0		Monomorphicc	Monomorphicc	-
C4H2-684	C4H2	0.42	50	0.42		23	0.09		Failedb	Failedb	-
CAD-1046	CAD	0.816	60	0.46		32	0.31		0.361	0.344	184956784
CAD-1114	CAD	0.948	60	0.15		32	0.03		0.047	0.062	184956785
CAD-118	CAD	0.862	60	0.27		0	nad		Failedb	Failedb	-
CAD-1244	CAD	0.932	60	0.46		32	0.34		Failedb	Failedb	-
CAD-1440	CAD	0.993	60	0.1		18	0		Failedb	Failedb	-
CAD-259	CAD	0.895	60	0.07		32	0.44		0.403	0.416	184956786
CAD-455	CAD	0.748	60	0.36		32	0.03		0.061	0.08	184956787
CAD-660	CAD	0.909	60	0.43		32	0.31		0.364	0.349	184956788
CCoAomt1-1249	CCoAomt	0.88	80	0.02		55	0		Monomorphicc	Monomorphicc	-
CCoAomt1-1426	CCoAomt	0.931	80	0.22		55	0.02		0.032	0.036	184956793
CCoAomt1-159	CCoAomt	0.908	50	0.1		23	0		Monomorphicc	Monomorphicc	-
CCoAomt1-2223	CCoAomt	0.844	20	0.5		0	nad		27.8%e	29.4%e	184956794
CCoAomt1-2415	CCoAomt	0.62	20	0.4		0	nad		23.1%e	23%e	184956795
CCoAomt1-244	CCoAomt	0.654	50	0.1		24	0.42		0.33	0.341	184956790
CCoAomt1-2972	CCoAomt	0.96	20	0.5		0	nad		0.184	0.191	184956796
CCoAomt1-404	CCoAomt	0.904	50	0.2		25	0.08		0.143	0.148	184956791
CCoAomt1-66	CCoAomt	0.615	30	0.1		23	0.39		0.385	0.391	184956789
CCoAomt1-806	CCoAomt	0.501	60	0.03		35	0		Monomorphicc	Monomorphicc	-
CCoAomt1-873	CCoAomt	0.944	60	0.23		33	0.24		0.159	0.175	184956792
CCoAomt1-980	CCoAomt	0.916	60	0.05		35	0		Monomorphicc	Monomorphicc	-
CesA3-190	CesA3	0.53	47	0.21		18	0.28		0.284	0.289	184956797
CesA3-54	CesA3	0.646	40	0.05		15	0.13		0.087	0.066	184956798
CesA4-319	CesA4	0.921	28	0.04		7	0		Failedb	Failedb	-
CesA7-493	CesA7	0.651	nad	nad		nad	nad		0.022	0.025	184956799
CHS-252	CHS	0.991	37	0.027027		37	0.027027		Monomorphicc	Monomorphicc	-
CHS-651	CHS	0.733	46	0.391304		46	0.391304		Monomorphicc	Monomorphicc	-
CHS-99	CHS	0.902	32	0.3125		32	0.3125		0.413	0.345	184956800
COBRA1-1054	COBRA1	0.925	39	0.0512821		39	0.0512821		0.021	0.022	184956806
COBRA1-184	COBRA1	0.989	40	0.125		40	0.125		0.105	0.085	184956801
COBRA1-413	COBRA1	0.973	40	0.275		40	0.275		0.167	0.156	184956802
COBRA1-477	COBRA1	0.844	40	0.3		40	0.3		0.16	0.149	184956803
COBRA1-595	COBRA1	0.883	37	0.162162		37	0.162162		0.052	0.069	184956804
COBRA1-749	COBRA1	0.614	35	0.228571		35	0.228571		0.106	0.082	184956805
COBRA2-35	COBRA2	0.995	31	0.16129		31	0.16129		0.11	0.086	184956807
COBRA2-399	COBRA2	0.861	32	0.15625		32	0.15625		0.109	0.086	184956808
COBRA2-501	COBRA2	0.73	32	0.3125		32	0.3125		0.33	0.366	184956809
COBRA2-603	COBRA2	0.831	32	0.15625		32	0.15625		0.107	0.085	184956810
COBRA3-142	COBRA3	0.993	37	0.27027		37	0.27027		Failedb	Failedb	-
COBRA3-202	COBRA3	0.674	37	0.27027		37	0.27027		Failedb	Failedb	-
COBRA3-309	COBRA3	0.937	37	0.108108		37	0.108108		0.106	0.078	184956811
COBRA3-423	COBRA3	0.894	39	0.102564		39	0.102564		0.099	0.08	184956812
COBRA3-505	COBRA3	0.995	39	0.102564		39	0.102564		0.107	0.081	184956813
COBRA3-583	COBRA3	0.79	39	0.25641		39	0.25641		0.169	0.157	184956814
COBRA3-644	COBRA3	0.81	39	0.128205		39	0.128205		0.076	0.066	184956815
Dhn1-187	Dhn1	0.727	135	0.36		50	0.25		0.441	0.4	184956816
Dhn1-304	Dhn1	0.49	135	0.35		50	0.25		Failedb	Failedb	-
Dhn1-413	Dhn1	0.675	135	0.02		50	0		0.008	0.012	184956817
Dhn1-612	Dhn1	0.729	135	0.4		49	0.43		0.329	0.372	184956818
Dhn1-689	Dhn1	0.718	135	0.41		43	0.25		Failedb	Failedb	-
Dhn2-191	Dhn2	0.435	56	0.428571		11	0.454545		Failedb	Failedb	-
Dhn2-264	Dhn2	0.981	56	0.428571		11	0.454545		0.209	0.212	184956819
Dhn2-321	Dhn2	0.981	56	0.428571		11	0.454545		0.195	0.192	184956820
Dhn2-410	Dhn2	0.704	56	0.125		11	0.272727		Failedb	Failedb	-
Dhn2-479	Dhn2	0.704	56	0.125		11	0.272727		Failedb	Failedb	-
ERD3-170	ERD3	0.907	110	0.109091		11	0.181818		Monomorphicc	Monomorphicc	-
ERD3-42	ERD3	0.974	110	0.163636		11	0		Failedb	Failedb	-
Glucan-172	Glucan	0.916	133	0.37		35	0.11		Failedb	Failedb	-
Glucan-900	Glucan	0.848	133	0.02		29	0		Monomorphicc	Monomorphicc	-
GRP3-162	GRP3	0.542	70	0.23		38	0.03		0.023	0.015	184956821
GRP3-304	GRP3	0.903	70	0.35		42	0.24		Failedb	Failedb	-
GRP3-402	GRP3	0.946	65	0.08		43	0		Monomorphicc	Monomorphicc	-
HDZ31-1324	HDZ31	0.971	40	0.025		40	0.025		0.005	0.007	184956825
HDZ31-136	HDZ31	0.937	40	0.4		40	0.4		0.472	0.473	184956822
HDZ31-1471	HDZ31	0.934	40	0.4		40	0.4		0.471	0.473	184956826
HDZ31-1632	HDZ31	0.933	40	0.025		40	0.025		0.001	Monomorphicc	184956827
HDZ31-2138	HDZ31	0.941	40	0.025		40	0.025		0.005	0.007	184956828
HDZ31-2268	HDZ31	0.831	40	0.4		40	0.4		0.473	0.473	184956829
HDZ31-2776	HDZ31	0.973	40	0.05		40	0.05		Monomorphicc	Monomorphicc	-
HDZ31-287	HDZ31	0.851	40	0.4		40	0.4		0.476	0.473	184956823
HDZ31-3140	HDZ31	0.631	40	0.4		40	0.4		0.473	0.473	184956830
HDZ31-3292	HDZ31	0.801	39	0.384615		39	0.384615		0.479	0.468	184956831
HDZ31-409	HDZ31	0.755	40	0.4		40	0.4		0.472	0.473	184956824
Korrigan-1205	Korrigan	0.95	36	0.25		36	0.25		0.275	0.303	184956839
Korrigan-1272	Korrigan	0.871	36	0.47		36	0.47		0.462	0.466	184956840
Korrigan-1395	Korrigan	0.937	39	0.23		39	0.23		0.266	0.231	184956841
Korrigan-1499	Korrigan	0.935	50	0.18		50	0.18		0.262	0.225	184956842
Korrigan-1687	Korrigan	0.954	53	0		53	0		0.004	0.005	184956843
Korrigan-1801	Korrigan	0.919	49	0.08		49	0.08		0.14	0.098	184956844
Korrigan-2019	Korrigan	0.72	51	0.04		51	0.04		0.001	Monomorphicc	184956845
Korrigan-2103	Korrigan	0.663	50	0.46		50	0.46		0.462	0.468	184956846
Korrigan-2387	Korrigan	0.689	40	0.48		40	0.48		Failedb	Failedb	-
Korrigan-255	Korrigan	0.946	24	0.08		24	0.08		0.002	Monomorphicc	184956833
Korrigan-2646	Korrigan	0.565	39	0.18		39	0.18		0.283	0.325	184956847
Korrigan-2722	Korrigan	0.891	39	0.49		39	0.49		0.467	0.473	184956848
Korrigan-2892	Korrigan	0.409	35	0.46		35	0.46		Failedb	Failedb	-
Korrigan-418	Korrigan	0.768	39	0.49		39	0.49		0.462	0.466	184956834
Korrigan-546	Korrigan	0.934	39	0.18		39	0.18		0.263	0.228	184956835
Korrigan-635	Korrigan	0.973	39	0.21		39	0.21		0.276	0.302	184956836
Korrigan-758	Korrigan	0.853	38	0.03		38	0.03		0.002	Monomorphicc	184956837
Korrigan-83	Korrigan	0.921	7	0.29		7	0.29		0.278	0.304	184956832
Korrigan-987	Korrigan	0.968	37	0.19		37	0.19		0.262	0.228	184956838
LAC2-635	LAC2	0.622	15	0.07		6	0.17		Monomorphicc	Monomorphicc	-
LAC2-816	LAC2	0.89	15	0.07		6	0		Monomorphicc	Monomorphicc	-
LAC4-189	LAC4	0.813	68	0.1		33	0.12		Monomorphicc	Monomorphicc	-
LAC4-496	LAC4	0.971	68	0.12		33	0.18		Failedb	Failedb	-
LIM2-1100	LIM2	0.806	39	0.358974		39	0.358974		0.332	0.351	184956849
LIM2-1616	LIM2	0.618	39	0.230769		39	0.230769		Failedb	Failedb	-
LIM2-2005	LIM2	0.887	39	0.230769		39	0.230769		0.316	0.288	184956850
LIM2-2372	LIM2	0.998	27	0.222222		27	0.222222		0.314	0.288	184956851
LIM2-933	LIM2	0.441	39	0.25641		39	0.25641		Failedb	Failedb	-
LP3-1-176	LP3-1	0.958	111	0.612613		11	0.272727		Failedb	Failedb	-
LP3-1-250	LP3-1	0.842	111	0.711712		11	0.454545		Failedb	Failedb	-
LP3-1-324	LP3-1	0.937	111	0.702703		11	0.454545		0.46	0.49	184956852
LP3-3-298	LP3-3	0.845	105	0.114286		11	0		0.016	0.022	184956853
LP3-3-43	LP3-3	0.764	105	0.161905		11	0.0909091		Failedb	Failedb	-
Myb1-1189	Myb1	0.685	40	0.45		40	0.45		0.218	0.252	184956860
Myb1-294	Myb1	0.96	40	0.45		40	0.45		0.215	0.25	184956857
Myb1-710	Myb1	0.946	40	0.45		40	0.45		0.211	0.25	184956858
Myb1-906	Myb1	0.949	40	0.45		40	0.45		0.213	0.25	184956859
Myb14-136	Myb14	0.957	29	0.241379		29	0.241379		Failedb	Failedb	-
Myb14-258	Myb14	0.996	29	0.0344828		29	0.0344828		0.019	0.017	184956855
Myb14-373	Myb14	0.992	29	0.0344828		29	0.0344828		Failedb	Failedb	-
Myb14-449	Myb14	0.727	29	0.103448		29	0.103448		0.263	0.289	184956856
Myb14-587	Myb14	0.675	29	0.241379		29	0.241379		Failedb	Failedb	-
Myb14-74	Myb14	0.818	29	0.103448		29	0.103448		0.272	0.279	184956854
Myb14-822	Myb14	0.583	29	0.103448		29	0.103448		Failedb	Failedb	-
Myb2-111	Myb2	0.914	40	0.125		40	0.125		0.222	0.203	184956861
Myb2-1136	Myb2	0.691	40	0.05		40	0.05		0.053	0.057	184956866
Myb2-1553	Myb2	0.912	39	0.0512821		39	0.0512821		0.042	0.049	184956867
Myb2-1811	Myb2	0.942	39	0.0512821		39	0.0512821		0.054	0.059	184956868
Myb2-194	Myb2	0.977	40	0.175		40	0.175		0.13	0.151	184956862
Myb2-337	Myb2	0.702	40	0.075		40	0.075		0.075	0.102	184956863
Myb2-526	Myb2	0.953	40	0.075		40	0.075		0.077	0.103	184956864
Myb2-784	Myb2	0.924	40	0.075		40	0.075		Failedb	Failedb	-
Myb2-844	Myb2	0.972	39	0.282051		39	0.282051		0.238	0.264	184956865
Myb2-942	Myb2	0.827	40	0.075		40	0.075		Failedb	Failedb	-
Myb4-119	Myb4	0.971	10	0.1		10	0.1		0.017	0.02	184956869
Myb8-786	Myb8	0.805	10	0.2		10	0.2		0.169	0.177	184956870
PAL1-P24-220	PAL1-P24	0.504	51	0		39	0		Failedb	Failedb	-
PAL1-P24-403	PAL1-P24	0.992	51	0.49		39	0.41		Failedb	Failedb	-
PAL1-P24-535	PAL1-P24	0.755	51	0.18		39	0.21		Failedb	Failedb	-
PAL1-P31-1118	PAL1-P31	0.599	18	0.11		12	0.08		0.149	0.177	184956873
PAL1-P31-1508	PAL1-P31	0.898	18	0.39		12	0.5		0.352	0.305	184956874
PAL1-P31-1691	PAL1-P31	0.982	18	0.44		12	0.34		Failedb	Failedb	-
PAL1-P31-1919	PAL1-P31	0.992	19	0.32		12	0.34		Failedb	Failedb	-
PAL1-P31-2090	PAL1-P31	0.773	19	0.26		12	0.34		Failedb	Failedb	-
PAL1-P31-2264	PAL1-P31	0.931	7	0.14		0	nad		Failedb	Failedb	-
PAL1-P31-256	PAL1-P31	0.674	7	0.29		0	nad		0.004	0.005	184956871
PAL1-P31-36	PAL1-P31	0.65	4	0.25		0	nad		Monomorphicc	Monomorphicc	-
PAL1-P31-371	PAL1-P31	0.939	7	0.29		0	nad		Monomorphicc	Monomorphicc	-
PAL1-P31-704	PAL1-P31	0.892	19	0.16		0	nad		0.005	0.01	184956872
PFK-203	PFK	0.602	51	0.0980392		nad	nad		0.042	0.034	184956875
PFK-267	PFK	0.707	51	0.0196078		0	nad		Monomorphicc	Monomorphicc	-
PFK-39	PFK	0.874	51	0.0588235		nad	nad		0.043	0.032	184956876
PHY-N-25	PHY-N	0.976	99	0.272727		10	0.2		0.074	0.056	184956877
PHY-N-258	PHY-N	0.935	99	0.272727		10	0.2		Monomorphicc	Monomorphicc	-
Pp1-104	Pp1	0.704	22	0.05		12	0		Failedb	Failedb	-
Pp1-312	Pp1	0.621	23	0.39		13	0.31		0.149	0.141	184956878
Pp4-233	Pp4	0.991	32	0.09		10	0.2		Failedb	Failedb	-
PR-AGP4-1021	PR-AGP4	0.844	183	0.02		55	0.04		0.029	0.03	184956880
PR-AGP4-1165	PR-AGP4	0.568	150	0.28		59	0.12		0.073	0.076	184956881
PR-AGP4-1303	PR-AGP4	0.743	175	0.11		60	0.07		Failedb	Failedb	-
PR-AGP4-132	PR-AGP4	0.757	175	0.08		63	0		Monomorphicc	Monomorphicc	-
PR-AGP4-1376	PR-AGP4	0.953	150	0.4		62	0.18		0.111	0.112	184956882
PR-AGP4-34	PR-AGP4	0.618	117	0.04		59	0.02		Failedb	Failedb	-
PR-AGP4-802	PR-AGP4	0.951	175	0.19		63	0.17		0.114	0.11	184956879
PR-AGP4-913	PR-AGP4	0.772	188	0.05		59	0.02		Monomorphicc	Monomorphicc	-
RD21-123	RD21	0.893	103	0.262136		11	0		Monomorphicc	Monomorphicc	-
RD21-566	RD21	0.891	103	0.145631		11	0.363636		0.186	0.168	184956883
RD21-630	RD21	0.598	103	0.38835		11	0.0909091		Failedb	Failedb	-
SCL1-1434	SCL1	0.984	40	0.125		40	0.125		Monomorphicc	Monomorphicc	-
SCL1-1749	SCL1	0.957	40	0.025		40	0.025		0.071	0.057	184956888
SCL1-228	SCL1	0.966	41	0.0731707		41	0.0731707		0.003	0.007	184956884
SCL1-318	SCL1	0.86	41	0.121951		41	0.121951		0.043	0.058	184956885
SCL1-431	SCL1	0.895	41	0.0731707		41	0.0731707		0.072	0.099	184956886
SCL1-570	SCL1	0.886	41	0.121951		41	0.121951		Failedb	Failedb	-
SCL1-663	SCL1	0.972	41	0.121951		41	0.121951		0.054	0.062	184956887
SCL1-823	SCL1	0.989	41	0.121951		41	0.121951		Failedb	Failedb	-
SPS-258	SPS	0.628	38	0.342105		nad	nad		Failedb	Failedb	-
SPS-407	SPS	0.722	38	0.0789474		nad	nad		Failedb	Failedb	-
THE1-271	THE1	0.859	33	0.424242		33	0.424242		Failedb	Failedb	-
THE1-390	THE1	0.914	33	0.424242		33	0.424242		0.499	0.495	184956890
THE1-74	THE1	0.684	32	0.5		32	0.5		0.362	0.394	184956889
a Minor allele frequency
b SNP that failed to be genotyped
c Monomorphic SNP
d Data not available
e High genotyping error rate
